# Supplementary material for: Effect of honey, as a natural deep eutectic solvent, on the phytochemical stability and anti-inflammatory activity of Eurycoma longifolia Jack
Source: Royal Society of Chemistry journal article supplement (doi:10.1039/d4ra05005c), 2025-01-01
Supplement: d4ra05005c1.pdf [file d4ra05005c1.pdf]

## Supplementary Information

### Supplementary figure

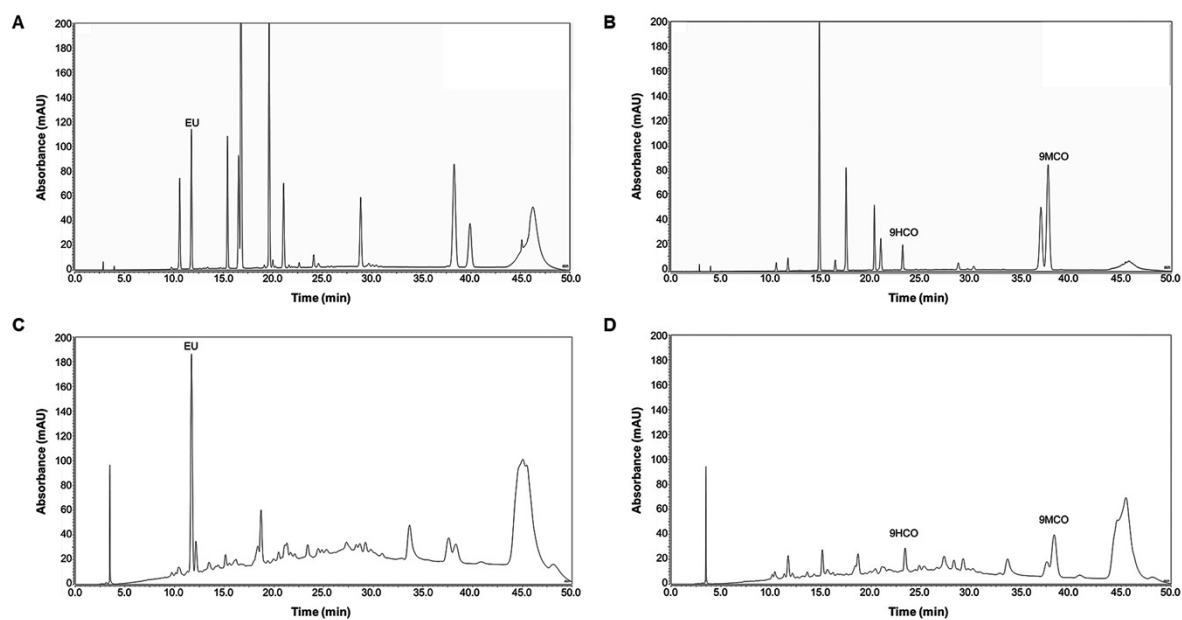

**Fig. S1** HPLC chromatograms of EL components including referent compounds at (A) 244 nm and (B) 272 nm, and HN-1-treated EL extract at (C) 244 nm and (D) 272 nm.
